# Supplementary material for: A Novel Rolling Circle Amplification-Based Detection of SARS-CoV-2 with Multi-Region Padlock Hybridization
Source: MDPI journal article supplement (doi:10.3390/diagnostics12092252), 2022-09-18
Supplement: s1 [file s1]

| Supplemental Table S1 - Padlocks for SARS-CoV-2 genome |              |                                                                                                                          |
|--------------------------------------------------------|--------------|--------------------------------------------------------------------------------------------------------------------------|
| S.N.                                                   | Name         | Padlock Sequence                                                                                                         |
| 1                                                      | 20650-S1     | /5Phos/GGTAATTGAGTTCTG cag cca gca gca atg aa ccc aac ccg ccc tac ccc cca acc cgc cct acc c t TTAGTGTATGCAGGG            |
| 2                                                      | 20800-S2     | /5Phos/CCATTGGTCCCAGAG cag cca gca gca atg aa ccc aac ccg ccc tac ccc cca acc cgc cct acc c t TCAAACCTCTTAGTA            |
| 3                                                      | 21100-S3     | /5Phos/AAAGGCTGAGAGACA cag cca gca gca atg aa ccc aac ccg ccc tac ccc cca acc cgc cct acc c t TCAAGGTCCATAAGA            |
| 4                                                      | 21250-S4     | /5Phos/GGTTCTAAAGCCGAA cag cca gca gca atg aa ccc aac ccg ccc tac ccc cca acc cgc cct acc c t GGCAAATCTACCAAT            |
| 5                                                      | 21400-S5     | /5Phos/AAAGTCCTAGGTTGA cag cca gca gca atg aa ccc aac ccg ccc tac ccc cca acc cgc cct acc c t TTATATTTTAATAGA            |
| 6                                                      | 22450-S11    | /5Phos/GTTGTTGACATGTTT cag cca gca gca atg aa ccc aac ccg ccc tac cct gca atg aa ccc aac ccg ccc tac cct GTCACACTCATATGA |
| 7                                                      | 22900-S12    | /5Phos/ATCTGGTAATATTTT cag cca gca gca atg aa ccc aac ccg ccc tac cct gca atg aa ccc aac ccg ccc tac cct GCTTGGTTTTGATGG |
| 8                                                      | 23050-S13    | /5Phos/AAGGCCGTTAAACTT cag cca gca gca atg aa ccc aac ccg ccc tac cct gca atg aa ccc aac ccg ccc tac cct AGGTGGCAAAACAGT |
| 9                                                      | 23200-S14    | /5Phos/ACCATTAACCTATA cag cca gca gca atg aa ccc aac ccg ccc tac cct gca atg aa ccc aac ccg ccc tac cct CTGTGTAACCTCCAAT |
| 10                                                     | 23500-S15    | /5Phos/CACATATGTCTGCAA cag cca gca gca atg aa ccc aac ccg ccc tac cct gca atg aa ccc aac ccg ccc tac cct AATTAATTGTTGAGT |
| 11                                                     | B_21_RdRpA1a | /5Phos/ TCACA TTAG GATAA cag cca gca gca atg aa ccc aac ccg ccc tac ccc cca acc cgc cct acc c t TTAGG CATGG CTCTA        |
| 12                                                     | B_22_RdRpA1b | /5Phos/ AAGAA CAAGT GGGCC cag cca gca gca atg aa ccc aac ccg ccc tac ccc cca acc cgc cct acc c t TGTAT GTTTG CGAGC       |
| 13                                                     | B_23_RdRpA1c | /5Phos/ ATAGA AACGG TGTGA cag cca gca gca atg aa ccc aac ccg ccc tac ccc cca acc cgc cct acc c t CTCAT TAGCT AATCT       |
| 14                                                     | B_24_RdRpA2a | /5Phos/ CATGA CCATT TCACT cag cca gca gca atg aa ccc aac ccg ccc tac ccc cca acc cgc cct acc c t TAGTG AACCG CCACA       |
| 15                                                     | B_25_RdRpA2b | /5Phos/ TCCTG ATGAG GTTCC cag cca gca gca atg aa ccc aac ccg ccc tac ccc cca acc cgc cct acc c t AGCAG TTGTG GCATC       |
| 16                                                     | B_28_RdRpA3b | /5Phos/ TTCTA TAAGA CACTC cag cca gca gca atg aa ccc aac ccg ccc tac ccc cca acc cgc cct acc c t TGTCA ACATC TCTAT       |
| 17                                                     | B_29_RdRpA3c | /5Phos/ AATAT GCGTA AAACCT cag cca gca gca atg aa ccc aac ccg ccc tac ccc cca acc cgc cct acc c t AGAAA TGTTT ACGCA      |
| 18                                                     | B_30_RdRpA4  | /5Phos/ ACAAC AGCAT CGTCA cag cca gca gca atg aa ccc aac ccg ccc tac ccc cca acc cgc cct acc c t GTGCT ATTGA AACAC       |
| 19                                                     | A_56_RdRp2a  | /5Phos/ GACAC CAGCTACGGT cag cca gca gca atg aa ccc aac ccg ccc tac ccc cca acc cgc cct acc c t AGTACTACAG ATAGA         |
| 20                                                     | A_57_RdRp2b  | /5Phos/ TTCAA TAATTTTTGA cag cca gca gca atg aa ccc aac ccg ccc tac ccc cca acc cgc cct acc c t GTGGCGGCTA TTGAT         |
| 21                                                     | A_58_RdRp3a  | /5Phos/ CTATA AACAGTTTTT cag cca gca gca atg aa ccc aac ccg ccc tac ccc cca acc cgc cct acc c t GGGTTTTCTA CATCA         |
| 22                                                     | A_59_RdRp3b  | /5Phos/ GCGCA GTAAGGATGG cag cca gca gca atg aa ccc aac ccg ccc tac ccc cca acc cgc cct acc c t ACGCACACAA TCGAA         |
| 23                                                     | B_32_EA1b    | /5Phos/ GATTG TGTGA ATTTG cag cca gca gca atg aa ccc aac ccg ccc tac ccc cca acc cgc cct acc c t TCCGG ATGAA CCGTC       |
| 24                                                     | B_33_EA1c    | /5Phos/ ATAAA TTGGT TCCAT cag cca gca gca atg aa ccc aac ccg ccc tac ccc cca acc cgc cct acc c t CGTCG TCGGT TCATC       |
| 25                                                     | B_34_EA2a    | /5Phos/ AGCTT GTGCT TACAA cag cca gca gca atg aa ccc aac ccg ccc tac ccc cca acc cgc cct acc c t AAGTT CGTAC TCATC       |
| 26                                                     | B_35_EA2b    | /5Phos/ ACCTG TCTCT TCCGA cag cca gca gca atg aa ccc aac ccg ccc tac ccc cca acc cgc cct acc c t ATTAA CTATT AACGT       |
| 27                                                     | B_36_EA2c    | /5Phos/ TACCA CGAAA GCAAG cag cca gca gca atg aa ccc aac ccg ccc tac ccc cca acc cgc cct acc c t TGTA CTAGC AAGAA        |
| 28                                                     | B_37_EA3a    | /5Phos/ ACACA ATCGA AGCGC cag cca gca gca atg aa ccc aac ccg ccc tac ccc cca acc cgc cct acc c t ATTGC AGCAG TACGC       |
| 29                                                     | B_39_EA3c    | /5Phos/ AACTC TAGAA GAATT cag cca gca gca atg aa ccc aac ccg ccc tac ccc cca acc cgc cct acc c t GACCA GAAGA TCAGG       |
| 30                                                     | B_50_E       | /5Phos/ GCGCA GTAAGGATGG cag cca gca gca atg aa ccc aac ccg ccc tac ccc cca acc cgc cct acc c t ACGCACACAA TCGAA         |
| 31                                                     | B_01_NA4a    | /5Phos/ CTCCC TCAGT TGCAA cag cca gca gca atg aa ccc aac ccg ccc tac ccc cca acc cgc cct acc c t TTGGT GTATT CAAGG       |

|    |              |                                                                                                                    |
|----|--------------|--------------------------------------------------------------------------------------------------------------------|
| 32 | B_02_NA4b    | /5Phos/ TAGCA GGATT GCGGG cag cca gca gca atg aa ccc aac ccg ccc tac ccc cca acc cgc cct acc c t CGATT GCAGC ATTGT |
| 33 | B_03_NA4c    | /5Phos/ GCAAT GTTGT TCCTT cag cca gca gca atg aa ccc aac ccg ccc tac ccc cca acc cgc cct acc c t CGTAG AAGCC TTTTG |
| 34 | B_04_NA5a    | /5Phos/ AGGCT TGACT GCCGC cag cca gca gca atg aa ccc aac ccg ccc tac ccc cca acc cgc cct acc c t ATGAG GAACG AGAAG |
| 35 | B_05_NA5b    | /5Phos/ TTGAA TTTCT TGAAC cag cca gca gca atg aa ccc aac ccg ccc tac ccc cca acc cgc cct acc c t TACTG CTGCC TGGAG |
| 36 | B_14_ORF_A1a | /5Phos/ CAACA CGATG CACCA cag cca gca gca atg aa ccc aac ccg ccc tac ccc cca acc cgc cct acc c t CAACG GCAGT ACAGA |
| 37 | B_16_ORF_A1c | /5Phos/ GCACA AGTTG TAGGT cag cca gca gca atg aa ccc aac ccg ccc tac ccc cca acc cgc cct acc c t CCCAC AGGGT CATTa |
| 38 | B_17_ORF_A2a | /5Phos/ ACGGT ACAGA CTGTG cag cca gca gca atg aa ccc aac ccg ccc tac ccc cca acc cgc cct acc c t TTCCA CATAC CGCAG |
| 39 | B_19_ORF_A2c | /5Phos/ CCGTT TAAAA ACGAT cag cca gca gca atg aa ccc aac ccg ccc tac ccc cca acc cgc cct acc c t ACTTA CACCG CAAAC |
| 40 | B_20_ORF_A3a | /5Phos/ GCCTG TGCCG CACGG cag cca gca gca atg aa ccc aac ccg ccc tac ccc cca acc cgc cct acc c t GACAT CAGTA CTAGT |

| Supplemental Table S2 - Synthetic IDT RNA targets and corresponding DNA padlocks |                                                                                                                                                                                                                                           |
|----------------------------------------------------------------------------------|-------------------------------------------------------------------------------------------------------------------------------------------------------------------------------------------------------------------------------------------|
| RNA Sequences                                                                    |                                                                                                                                                                                                                                           |
| A35                                                                              | rUrGrA rGrUrU rArUrG rArGrG rArUrC rArArG rArUrG rCrArC rUrUrU rUrCrG rCrArU rArUrA rCrArA rArArC rGrUrA rArUrG rUrCrA rUrCrC rCrUrA rCrUrA rUrArA rCrUrC rArArA rUrGrA rArUrC rUrUrA rArGrU rArUrG rCrCrA rUrUrA rGrUrG rCrArA rArGrA rA |
| A36                                                                              | rUrArG rArGrC rUrCrG rCrArC rCrGrU rArGrC rUrGrG rUrGrU rCrUrC rUrArU rCrUrG rUrArG rUrArC rUrArU rGrArC rCrArA rUrArG rArCrA rGrUrU rUrCrA rUrCrA rArArA rArUrU rArUrU rGrArA rArUrC rArArU rArGrC rCrGrC rCrArC rUrArG rArGrG rArGrC rU |
| A37                                                                              | rArCrU rGrUrA rGrUrA rArUrU rGrGrA rArCrA rArGrC rArArA rUrUrC rUrArU rGrGrU rGrGrU rUrGrG rCrArC rArArC rArUrG rUrUrA rArArA rArCrU rGrUrU rUrArU rArGrU rGrArU rGrUrA rGrArA rArArC rCrCrU rCrArC rCrUrU                                |
| Padlocks for IDT targets                                                         |                                                                                                                                                                                                                                           |
| Padlock 1 binds to A35                                                           | AGTGC ATCTTGATCC CAGCCAGCAGCAATGAACCCAACCCGCCCTACCCTGCAATGAACCCAACCCGCCCTACCCT TTTGTATATG CGAAA                                                                                                                                           |
| Padlock 2 binds to A35                                                           | GATTC ATTTGAGTTA CAGCCAGCAGCAATGAACCCAACCCGCCCTACCCTGCAATGAACCCAACCCGCCCTACCCT TAATGGCATA CTAA                                                                                                                                            |
| Padlock 3 binds to A36                                                           | GACAC CAGCTACGGT CAGCCAGCAGCAATGAACCCAACCCGCCCTACCCTGCAATGAACCCAACCCGCCCTACCCT AGTACTACAG ATAGA                                                                                                                                           |
| Padlock 4 binds to A36                                                           | TTCAA TAATTTTTGA CAGCCAGCAGCAATGAACCCAACCCGCCCTACCCTGCAATGAACCCAACCCGCCCTACCCT GTGGCGGCTA TTGAT                                                                                                                                           |
| Padlock 5 binds to A37                                                           | CTATA AACAGTTTTT CAGCCAGCAGCAATGAACCCAACCCGCCCTACCCTGCAATGAACCCAACCCGCCCTACCCT GGGTTTTCTA CATCA                                                                                                                                           |

| Supplemental Table S3 - CT Values-RT-qPCR Positive Samples and MP-RCA Result |                           |             |          |          |               |
|------------------------------------------------------------------------------|---------------------------|-------------|----------|----------|---------------|
| #                                                                            | Covid positive samples ID | ORF1ab gene | N gene   | S gene   | MP-RCA Result |
| 1                                                                            | 2035801464                | 23.27487    | 23.61304 | 23.28181 | Positive      |
| 2                                                                            | LWPOAAAA58454b            | 15.659471   | 16.66798 | 15.4466  | Positive      |
| 3                                                                            | GBPOAAAA12232a            | 17.18241    | 18.77288 | 17.91845 | Positive      |
| 4                                                                            | LWPOAAAA00365B            | 28.274288   | 28.44961 | 29.04769 | Positive      |
| 5                                                                            | LWPOAAAA00365A            | 28.176115   | 28.30485 | 28.05944 | Positive      |
| 6                                                                            | 212522725                 | 10.919122   | 11.64765 | 11.40171 | Positive      |
| 7                                                                            | 212530236                 | 11.386249   | 12.55814 | 11.91892 | Positive      |
| 8                                                                            | 2125300742                | 17.700424   | 18.94571 | 17.46984 | Positive      |
| 9                                                                            | 2125303035                | 17.266712   | 18.80636 | 17.88756 | Positive      |
| 10                                                                           | 2125303279                | 12.567639   | 13.21923 | 12.93188 | Positive      |
| 11                                                                           | 2125303501                | 16.098845   | 16.69431 | 16.51827 | Positive      |
| 12                                                                           | 2125303808                | 20.016888   | 21.33041 | 20.2876  | Positive      |
| 13                                                                           | 2123500887                | 11.829923   | 12.32806 | 11.77036 | Positive      |
| 14                                                                           | 2123600827                | 17.07823    | 18.17433 | 17.03232 | Positive      |
| 15                                                                           | 2123700466                | 13.417307   | 14.48047 | 13.37219 | Positive      |
| 16                                                                           | 2123900222                | 19.242903   | 19.50288 | 18.76111 | Positive      |
| 17                                                                           | 2123900441                | 17.656605   | 18.86248 | 18.36178 | Positive      |
| 18                                                                           | 2124000029                | 15.848645   | 16.24882 | 15.70552 | Positive      |
| 19                                                                           | 2124200486                | 10.159071   | 21.47816 | 10.49172 | Positive      |
| 20                                                                           | 212600098                 | 13.918985   | 14.60279 | 14.52399 | Positive      |
| 21                                                                           | 2125803146                | 12.557142   | 12.94538 | 13.05601 | Positive      |
| 22                                                                           | 2125903261                | 18.127544   | 19.5281  | 18.26682 | Positive      |
| 23                                                                           | 2125903489                | 12.950025   | 13.59756 | 14.09471 | Positive      |
| 24                                                                           | 2126000909                | 12.502594   | 14.68838 | 13.83371 | Positive      |
| 25                                                                           | 2126001025                | 15.764762   | 17.35576 | 16.83654 | Positive      |
| 26                                                                           | 2126002199                | 14.20577    | 15.51222 | 14.88552 | Positive      |
| 27                                                                           | VWPOAAAA96579             | 16.380901   | 16.91995 | 16.42412 | Positive      |
| 28                                                                           | 212670698                 | 16.788023   | 18.31712 | 17.65634 | Positive      |
| 29                                                                           | 2125704756                | 14.285051   | 15.36371 | 14.8302  | Positive      |
| 30                                                                           | 2126402945                | 16.981188   | 16.90966 | 16.5932  | Positive      |
| 31                                                                           | 2126501550                | 17.32538    | 18.70735 | 17.96566 | Positive      |
| 32                                                                           | 2126501814                | 12.683517   | 14.17823 | 13.96058 | Positive      |

|    |            |            |          |          |          |
|----|------------|------------|----------|----------|----------|
| 33 | 2126503554 | 10.528878  | 9.672027 | 11.04018 | Positive |
| 34 | 2126504366 | 16.349142  | 17.58014 | 16.60923 | Positive |
| 35 | 2126700403 | 13.782969  | 15.89645 | 15.61534 | Positive |
| 36 | 2125300020 | 24.84858   | 25.2625  | 24.27172 | Negative |
| 37 | 2125302959 | 15.2212105 | 16.44221 | 15.78725 | Negative |
| 38 | 2125303232 | 18.29622   | 19.73975 | 18.80582 | Negative |
| 39 | 2123500431 | 16.560055  | 17.94736 | 17.73421 | Negative |
| 40 | 2123500909 | 11.9387665 | 15.91224 | 11.96017 | Negative |
| 41 | 2123600160 | 13.316713  | 13.41303 | 13.44627 | Negative |
| 42 | 21253684   | 15.521948  | 17.27747 | 16.37066 | Negative |
| 43 | 2125901223 | 12.094004  | 13.8473  | 13.37203 | Negative |
| 44 | 2126702976 | 10.843681  | 11.82756 | 11.79091 | Negative |
| 45 | 2126703317 | 16.764202  | 17.83091 | 16.82079 | Negative |

**S-gene Dropout samples CT Values-RT-qPCR and MP-RCA Result**

| #  | Sample Name   | ORF1ab Ct | N gene Ct | S gene Ct | MP-RCA Result |
|----|---------------|-----------|-----------|-----------|---------------|
| 1  | 210604290     | 16.043627 | 16.59804  |           | Positive      |
| 2  | 2106303243    | 23.41151  | 23.04137  |           | Positive      |
| 3  | 2106304054    | 21.56134  | 21.42687  |           | Positive      |
| 4  | 210604290b    | 16.043627 | 16.59804  |           | Positive      |
| 5  | 2106400907    | 18.51223  | 19.60957  |           | Positive      |
| 6  | 2106500109    | 18.796625 | 19.09117  |           | Positive      |
| 7  | 2106705667    | 15.869253 | 18.62836  |           | Positive      |
| 8  | GBPOAAAA13141 | 24.553534 | 23.73351  |           | Positive      |
| 9  | LWPOAAAA02478 | 30.008303 | 29.61234  |           | Positive      |
| 10 | LWPOAAAA26517 | 29.15502  | 27.9469   |           | Positive      |

**Supplemental Table S4 – Padlock Specificity Computational Analysis**

| <b>Padlock Name</b> | <b>Human coronavirus 229E</b> | <b>Human coronavirus OC43</b> | <b>Human coronavirus HKU1</b> | <b>Human coronavirus NL63</b> | <b>Severe acute respiratory syndrome-related coronavirus</b> | <b>Middle East respiratory syndrome-related coronavirus</b> | <b>Adenoviridae</b> | <b>Human metapneumovirus</b> | <b>Human respirovirus 3</b> | <b>Human respirovirus 1</b> |
|---------------------|-------------------------------|-------------------------------|-------------------------------|-------------------------------|--------------------------------------------------------------|-------------------------------------------------------------|---------------------|------------------------------|-----------------------------|-----------------------------|
| 20650-S1            | 0                             | 0                             | 0                             | 0                             | ≥100                                                         | 0                                                           | 0                   | 0                            | 0                           | 0                           |
| 20800-S2            | 0                             | 0                             | 0                             | 0                             | ≥100                                                         | 0                                                           | 0                   | 0                            | 0                           | 0                           |
| 21100-S3            | 0                             | 0                             | 0                             | 0                             | 99                                                           | 0                                                           | 0                   | 0                            | 0                           | 0                           |
| 21250-S4            | 0                             | 0                             | 0                             | 0                             | ≥100                                                         | 0                                                           | 0                   | 0                            | 0                           | 0                           |
| 21400-S5            | 0                             | 0                             | 0                             | 0                             | ≥100                                                         | 0                                                           | 0                   | 0                            | 0                           | 0                           |
| 22450-S11           | 0                             | 0                             | 0                             | 0                             | ≥100                                                         | 0                                                           | 0                   | 0                            | 0                           | 0                           |
| 22900-S12           | 0                             | 0                             | 0                             | 0                             | ≥100                                                         | 0                                                           | 0                   | 0                            | 0                           | 0                           |
| 23050-S13           | 0                             | 0                             | 0                             | 0                             | ≥100                                                         | 0                                                           | 0                   | 0                            | 0                           | 0                           |
| 23200-S14           | 0                             | 0                             | 0                             | 0                             | ≥100                                                         | 0                                                           | 0                   | 0                            | 0                           | 0                           |
| 23500-S15           | 0                             | 0                             | 0                             | 0                             | ≥100                                                         | 0                                                           | 0                   | 0                            | 0                           | 0                           |
| B_21_RdRpA1a        | 0                             | 0                             | 0                             | 0                             | ≥100                                                         | 0                                                           | 0                   | 0                            | 0                           | 0                           |
| B_22_RdRpA1b        | 0                             | 0                             | 0                             | 0                             | ≥100                                                         | 0                                                           | 0                   | 0                            | 0                           | 0                           |
| B_23_RdRpA1c        | 0                             | 0                             | 0                             | 0                             | ≥100                                                         | 0                                                           | 0                   | 0                            | 0                           | 0                           |
| B_24_RdRpA2a        | 0                             | 0                             | 0                             | 0                             | ≥100                                                         | 0                                                           | 0                   | 0                            | 0                           | 0                           |
| B_25_RdRpA2b        | 0                             | 0                             | 0                             | 0                             | ≥100                                                         | 0                                                           | 0                   | 0                            | 0                           | 0                           |
| B_28_RdRpA3b        | 0                             | 0                             | 0                             | 0                             | ≥100                                                         | 0                                                           | 0                   | 0                            | 0                           | 0                           |
| B_29_RdRpA3c        | 0                             | 0                             | 0                             | 0                             | ≥100                                                         | 0                                                           | 0                   | 0                            | 0                           | 0                           |
| B_30_RdRpA4         | 0                             | 0                             | 0                             | 0                             | ≥100                                                         | 0                                                           | 0                   | 0                            | 0                           | 0                           |
| A_56_RdRp2a         | 0                             | 0                             | 0                             | 0                             | ≥100                                                         | 0                                                           | 0                   | 0                            | 0                           | 0                           |
| A_57_RdRp2b         | 0                             | 0                             | 0                             | 0                             | ≥100                                                         | 0                                                           | 0                   | 0                            | 0                           | 0                           |
| A_58_RdRp3a         | 0                             | 0                             | 0                             | 0                             | ≥100                                                         | 0                                                           | 0                   | 0                            | 0                           | 0                           |
| A_59_RdRp3b         | 0                             | 0                             | 0                             | 0                             | ≥100                                                         | 0                                                           | 0                   | 0                            | 0                           | 0                           |
| B_32_EA1b           | 0                             | 0                             | 0                             | 0                             | ≥100                                                         | 0                                                           | 0                   | 0                            | 0                           | 0                           |
| B_33_EA1c           | 0                             | 0                             | 0                             | 0                             | ≥100                                                         | 0                                                           | 0                   | 0                            | 0                           | 0                           |
| B_34_EA2a           | 0                             | 0                             | 0                             | 0                             | ≥100                                                         | 0                                                           | 0                   | 0                            | 0                           | 0                           |
| B_35_EA2b           | 0                             | 0                             | 0                             | 0                             | ≥100                                                         | 0                                                           | 0                   | 0                            | 0                           | 0                           |

|              |   |   |   |   |      |   |   |   |   |   |
|--------------|---|---|---|---|------|---|---|---|---|---|
| B_36_EA2c    | 0 | 0 | 0 | 0 | ≥100 | 0 | 0 | 0 | 0 | 0 |
| B_37_EA3a    | 0 | 0 | 0 | 0 | ≥100 | 0 | 0 | 0 | 0 | 0 |
| B_39_EA3c    | 0 | 0 | 0 | 0 | ≥100 | 0 | 0 | 0 | 0 | 0 |
| B_50_E       | 0 | 0 | 0 | 0 | ≥100 | 0 | 0 | 0 | 0 | 0 |
| B_01_NA4a    | 0 | 0 | 0 | 0 | ≥100 | 0 | 0 | 0 | 0 | 0 |
| B_02_NA4b    | 0 | 0 | 0 | 0 | ≥100 | 0 | 0 | 0 | 0 | 0 |
| B_03_NA4c    | 0 | 0 | 0 | 0 | ≥100 | 0 | 0 | 0 | 0 | 0 |
| B_04_NA5a    | 0 | 0 | 0 | 0 | ≥100 | 0 | 0 | 0 | 0 | 0 |
| B_05_NA5b    | 0 | 0 | 0 | 0 | ≥100 | 0 | 0 | 0 | 0 | 0 |
| B_14_ORF_A1a | 0 | 0 | 0 | 0 | ≥100 | 0 | 0 | 0 | 0 | 0 |
| B_16_ORF_A1c | 0 | 0 | 0 | 0 | ≥100 | 0 | 0 | 0 | 0 | 0 |
| B_17_ORF_A2a | 0 | 0 | 0 | 0 | ≥100 | 0 | 0 | 0 | 0 | 0 |
| B_19_ORF_A2c | 0 | 0 | 0 | 0 | ≥100 | 0 | 0 | 0 | 0 | 0 |

| Padlock Name | Human orthorubulavirus 2 | Human orthorubulavirus 4 | Influenza A virus | Influenza B virus | Enterovirus | Respiratory syncytial virus | Chlamydia pneumoniae | Haemophilus influenzae | Legionella pneumophila | Mycobacterium tuberculosis |
|--------------|--------------------------|--------------------------|-------------------|-------------------|-------------|-----------------------------|----------------------|------------------------|------------------------|----------------------------|
| 20650-S1     | 0                        | 0                        | 0                 | 0                 | 0           | 0                           | 0                    | 0                      | 0                      | 0                          |
| 20800-S2     | 0                        | 0                        | 0                 | 0                 | 0           | 0                           | 0                    | 0                      | 0                      | 0                          |
| 21100-S3     | 0                        | 0                        | 0                 | 0                 | 0           | 0                           | 0                    | 0                      | 0                      | 0                          |
| 21250-S4     | 0                        | 0                        | 0                 | 0                 | 0           | 0                           | 0                    | 0                      | 0                      | 0                          |
| 21400-S5     | 0                        | 0                        | 0                 | 0                 | 0           | 0                           | 0                    | 0                      | 0                      | 0                          |
| 22450-S11    | 0                        | 0                        | 0                 | 0                 | 0           | 0                           | 0                    | 0                      | 0                      | 0                          |
| 22900-S12    | 0                        | 0                        | 0                 | 0                 | 0           | 0                           | 0                    | 0                      | 0                      | 0                          |
| 23050-S13    | 0                        | 0                        | 0                 | 0                 | 0           | 0                           | 0                    | 0                      | 0                      | 0                          |
| 23200-S14    | 0                        | 0                        | 0                 | 0                 | 0           | 0                           | 0                    | 0                      | 0                      | 0                          |
| 23500-S15    | 0                        | 0                        | 0                 | 0                 | 0           | 0                           | 0                    | 0                      | 0                      | 0                          |
| B_21_RdRpA1a | 0                        | 0                        | 0                 | 0                 | 0           | 0                           | 0                    | 0                      | 0                      | 0                          |
| B_22_RdRpA1b | 0                        | 0                        | 0                 | 0                 | 0           | 0                           | 0                    | 0                      | 0                      | 0                          |
| B_23_RdRpA1c | 0                        | 0                        | 0                 | 0                 | 0           | 0                           | 0                    | 0                      | 0                      | 0                          |
| B_24_RdRpA2a | 0                        | 0                        | 0                 | 0                 | 0           | 0                           | 0                    | 0                      | 0                      | 0                          |
| B_25_RdRpA2b | 0                        | 0                        | 0                 | 0                 | 0           | 0                           | 0                    | 0                      | 0                      | 0                          |
| B_28_RdRpA3b | 0                        | 0                        | 0                 | 0                 | 0           | 0                           | 0                    | 0                      | 0                      | 0                          |

|              |   |   |   |   |   |   |   |   |   |   |
|--------------|---|---|---|---|---|---|---|---|---|---|
| B_29_RdRpA3c | 0 | 0 | 0 | 0 | 0 | 0 | 0 | 0 | 0 | 0 |
| B_30_RdRpA4  | 0 | 0 | 0 | 0 | 0 | 0 | 0 | 0 | 0 | 0 |
| A_56_RdRp2a  | 0 | 0 | 0 | 0 | 0 | 0 | 0 | 0 | 0 | 0 |
| A_57_RdRp2b  | 0 | 0 | 0 | 0 | 0 | 0 | 0 | 0 | 0 | 0 |
| A_58_RdRp3a  | 0 | 0 | 0 | 0 | 0 | 0 | 0 | 0 | 0 | 0 |
| A_59_RdRp3b  | 0 | 0 | 0 | 0 | 0 | 0 | 0 | 0 | 0 | 0 |
| B_32_EA1b    | 0 | 0 | 0 | 0 | 0 | 0 | 0 | 0 | 0 | 0 |
| B_33_EA1c    | 0 | 0 | 0 | 0 | 0 | 0 | 0 | 0 | 0 | 0 |
| B_34_EA2a    | 0 | 0 | 0 | 0 | 0 | 0 | 0 | 0 | 0 | 0 |
| B_35_EA2b    | 0 | 0 | 0 | 0 | 0 | 0 | 0 | 0 | 0 | 0 |
| B_36_EA2c    | 0 | 0 | 0 | 0 | 0 | 0 | 0 | 0 | 0 | 0 |
| B_37_EA3a    | 0 | 0 | 0 | 0 | 0 | 0 | 0 | 0 | 0 | 0 |
| B_39_EA3c    | 0 | 0 | 0 | 0 | 0 | 0 | 0 | 0 | 0 | 0 |
| B_50_E       | 0 | 0 | 0 | 0 | 0 | 0 | 0 | 0 | 0 | 0 |
| B_01_NA4a    | 0 | 0 | 0 | 0 | 0 | 0 | 0 | 0 | 0 | 0 |
| B_02_NA4b    | 0 | 0 | 0 | 0 | 0 | 0 | 0 | 0 | 0 | 0 |
| B_03_NA4c    | 0 | 0 | 0 | 0 | 0 | 0 | 0 | 0 | 0 | 0 |
| B_04_NA5a    | 0 | 0 | 0 | 0 | 0 | 0 | 0 | 0 | 0 | 0 |
| B_05_NA5b    | 0 | 0 | 0 | 0 | 0 | 0 | 0 | 0 | 0 | 0 |
| B_14_ORF_A1a | 0 | 0 | 0 | 0 | 0 | 0 | 0 | 0 | 0 | 0 |
| B_16_ORF_A1c | 0 | 0 | 0 | 0 | 0 | 0 | 0 | 0 | 0 | 0 |
| B_17_ORF_A2a | 0 | 0 | 0 | 0 | 0 | 0 | 0 | 0 | 0 | 0 |
| B_19_ORF_A2c | 0 | 0 | 0 | 0 | 0 | 0 | 0 | 0 | 0 | 0 |

| Padlock Name | Streptococcus pneumoniae | Streptococcus pyogenes | Bordetella pertussis | Mycoplasma pneumoniae | Pneumocystis jirovecii | Candida albicans | Pseudomonas aeruginosa | Staphylococcus epidermidis | Streptococcus salivarius |
|--------------|--------------------------|------------------------|----------------------|-----------------------|------------------------|------------------|------------------------|----------------------------|--------------------------|
| 20650-S1     | 0                        | 0                      | 0                    | 0                     | 0                      | 0                | 0                      | 0                          | 0                        |
| 20800-S2     | 0                        | 0                      | 0                    | 0                     | 0                      | 0                | 0                      | 0                          | 0                        |
| 21100-S3     | 0                        | 0                      | 0                    | 0                     | 0                      | 0                | 0                      | 0                          | 0                        |
| 21250-S4     | 0                        | 0                      | 0                    | 0                     | 0                      | 0                | 0                      | 0                          | 0                        |
| 21400-S5     | 0                        | 0                      | 0                    | 0                     | 0                      | 0                | 0                      | 0                          | 0                        |
| 22450-S11    | 0                        | 0                      | 0                    | 0                     | 0                      | 0                | 0                      | 0                          | 0                        |

|              |   |   |   |   |   |   |   |   |   |
|--------------|---|---|---|---|---|---|---|---|---|
| 22900-S12    | 0 | 0 | 0 | 0 | 0 | 0 | 0 | 0 | 0 |
| 23050-S13    | 0 | 0 | 0 | 0 | 0 | 0 | 0 | 0 | 0 |
| 23200-S14    | 0 | 0 | 0 | 0 | 0 | 0 | 0 | 0 | 0 |
| 23500-S15    | 0 | 0 | 0 | 0 | 0 | 0 | 0 | 0 | 0 |
| B_21_RdRpA1a | 0 | 0 | 0 | 0 | 0 | 0 | 0 | 0 | 0 |
| B_22_RdRpA1b | 0 | 0 | 0 | 0 | 0 | 0 | 0 | 0 | 0 |
| B_23_RdRpA1c | 0 | 0 | 0 | 0 | 0 | 0 | 0 | 0 | 0 |
| B_24_RdRpA2a | 0 | 0 | 0 | 0 | 0 | 0 | 0 | 0 | 0 |
| B_25_RdRpA2b | 0 | 0 | 0 | 0 | 0 | 0 | 0 | 0 | 0 |
| B_28_RdRpA3b | 0 | 0 | 0 | 0 | 0 | 0 | 0 | 0 | 0 |
| B_29_RdRpA3c | 0 | 0 | 0 | 0 | 0 | 0 | 0 | 0 | 0 |
| B_30_RdRpA4  | 0 | 0 | 0 | 0 | 0 | 0 | 0 | 0 | 0 |
| A_56_RdRp2a  | 0 | 0 | 0 | 0 | 0 | 0 | 0 | 0 | 0 |
| A_57_RdRp2b  | 0 | 0 | 0 | 0 | 0 | 0 | 0 | 0 | 0 |
| A_58_RdRp3a  | 0 | 0 | 0 | 0 | 0 | 0 | 0 | 0 | 0 |
| A_59_RdRp3b  | 0 | 0 | 0 | 0 | 0 | 0 | 0 | 0 | 0 |
| B_32_EA1b    | 0 | 0 | 0 | 0 | 0 | 0 | 0 | 0 | 0 |
| B_33_EA1c    | 0 | 0 | 0 | 0 | 0 | 0 | 0 | 0 | 0 |
| B_34_EA2a    | 0 | 0 | 0 | 0 | 0 | 0 | 0 | 0 | 0 |
| B_35_EA2b    | 0 | 0 | 0 | 0 | 0 | 0 | 0 | 0 | 0 |
| B_36_EA2c    | 0 | 0 | 0 | 0 | 0 | 0 | 0 | 0 | 0 |
| B_37_EA3a    | 0 | 0 | 0 | 0 | 0 | 0 | 0 | 0 | 0 |
| B_39_EA3c    | 0 | 0 | 0 | 0 | 0 | 0 | 0 | 0 | 0 |
| B_50_E       | 0 | 0 | 0 | 0 | 0 | 0 | 0 | 0 | 0 |
| B_01_NA4a    | 0 | 0 | 0 | 0 | 0 | 0 | 0 | 0 | 0 |
| B_02_NA4b    | 0 | 0 | 0 | 0 | 0 | 0 | 0 | 0 | 0 |
| B_03_NA4c    | 0 | 0 | 0 | 0 | 0 | 0 | 0 | 0 | 0 |
| B_04_NA5a    | 0 | 0 | 0 | 0 | 0 | 0 | 0 | 0 | 0 |
| B_05_NA5b    | 0 | 0 | 0 | 0 | 0 | 0 | 0 | 0 | 0 |
| B_14_ORF_A1a | 0 | 0 | 0 | 0 | 0 | 0 | 0 | 0 | 0 |
| B_16_ORF_A1c | 0 | 0 | 0 | 0 | 0 | 0 | 0 | 0 | 0 |
| B_17_ORF_A2a | 0 | 0 | 0 | 0 | 0 | 0 | 0 | 0 | 0 |
| B_19_ORF_A2c | 0 | 0 | 0 | 0 | 0 | 0 | 0 | 0 | 0 |



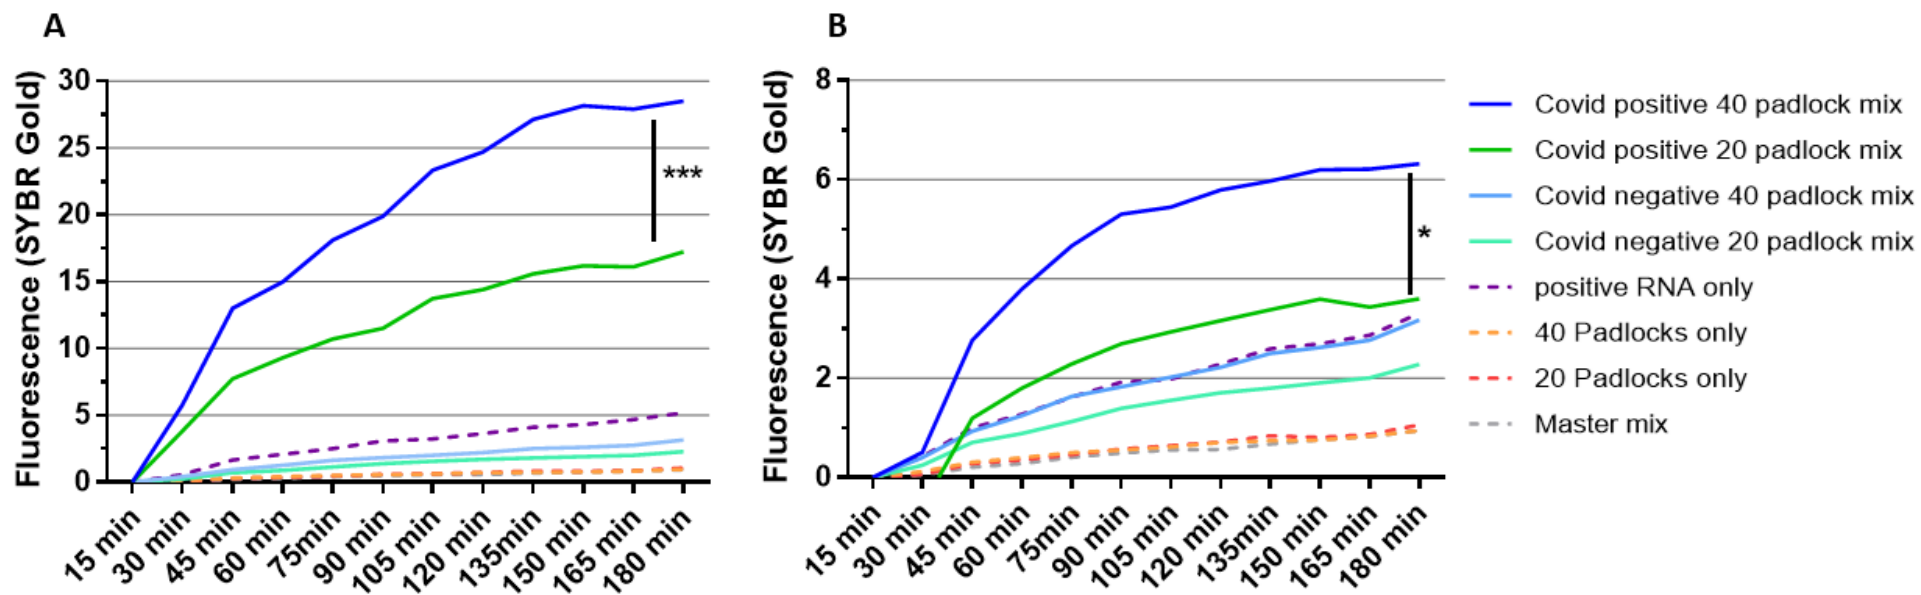

**Supplemental Figure S1: Detection of SARS-CoV-2 S-gene dropout variants.** RNA was isolated from previously known S-gene dropout sample and RCA was performed with either 20 or 40 mix. A and B are two different positive patient samples having S-gene dropout. SYBR gold fluorescence was measured for 3 hrs at 15 min interval at Excitation 495 nm, Emission 537 nm. The statistical significance was calculated using one way ANOVA between different groups. \*  $P < 0.05$ , \*\*\*  $P < 0.0001$ .
